# Supplementary material for: Biomedical research grant resubmission: rates and factors related to success – a scoping review
Source: PubMed Central journal article supplement — BMJ Open. 2024 Nov 14;14(11):e089927. doi: 10.1136/bmjopen-2024-089927 (PMC11575303; doi:10.1136/bmjopen-2024-089927), 2024-11-14
Supplement: bmjopen-14-11-s001.pdf [file bmjopen-14-11-s001.pdf]

## Appendix 1. Search Strategies

Web of Science via UBC

2022-11-10

**(medic\* NEAR/1 (research\* or academic\* or school\* or facultt\*)) OR (biomedical research\* or biolog\* science\*) (Topic) and (((research NEAR/2 (support\* or feedback)) OR "peer review\*" OR ((organi?ed or government\*) NEAR/2 financ\*)) OR fellowship\* OR scholarship\* OR award\* OR prize\* OR ((application\* or proposal\*) NEAR/5 (resubmi\* or re-submi\* or resourc\* or nomination\* or stud\* or support\* or discussion or review or feedback or database or probabilit\* or likelihood or parity or dispar\* or submit\* or submiss\* or success\*) and (grant\* or fund\*)) OR ((fund\* or grant\*) NEAR/5 (applica\* or reappl\* or gap or gaps or rate or rates or probabilit\* or likelihood or parity or dispar\* or submit\* or resubmi\* or re-submi\* or submiss\* or success\* or resourc\* or stud\* or proposal\* or support\* or discussion\* or review\* or feedback\* or database))) (Topic) and research personnel OR applicant\* OR early career OR scientist\* OR researcher\* OR research team\* OR research cluster\* OR physician\* OR post doctoral or postdoctoral or PhD or DPhil or MDPHD or DSci OR investigator\* (Topic) = 5, 047**

Database: Embase <1974 to 2022 November 09>

Search Strategy:

- 
- 1 medical research/ (230846)
  - 2 biomedical research\*.tw,kf. (20505)
  - 3 biolog\* science\*.tw,kf. (4806)
  - 4 (medic\* adj1 (research\* or academic\* or school\* or faculty)).tw,kf. (122163)
  - 5 medical school/ (67251)
  - 6 or/1-5 (390549)
  - 7 (research adj2 (support\* or feedback)).tw,kf. (24201)
  - 8 "peer review"/ (35743)
  - 9 peer review.tw,kf. (14033)
  - 10 public finance/ (116)
  - 11 financial management/ (119090)
  - 12 ((organi?ed or government\*) adj2 financ\*).tw,kf. (980)
  - 13 fellowship\*.tw,kf. (21865)
  - 14 scholarship\*.tw,kf. (8840)
  - 15 "awards and prizes"/ (28338)
  - 16 award\*.tw,kf. (31839)
  - 17 prize\*.tw,kf. (9721)
  - 18 (((application\* or proposal\*) adj5 (resubmi\* or re-submi\* or resourc\* or nomination\* or stud\* or support\* or discussion or review or feedback or database or probabilit\* or likelihood or parity or dispar\* or submit\* or submiss\* or success\*)) and (grant\* or fund\*)).tw,kf. (6696)
  - 19 ((fund\* or grant\*) adj5 (applica\* or reappl\* or gap or gaps or rate or rates or probabilit\* or likelihood or parity or dispar\* or submit\* or resubmi\* or re-submi\* or submiss\* or success\* or resourc\* or stud\* or proposal\* or support\* or discussion\* or review\* or feedback\* or database)).tw,kf. (93346)
  - 20 or/7-19 (342290)
  - 21 personnel/ (18448)
  - 22 research personnel.tw,kf. (863)
  - 23 applicant\*.tw,kf. (12034)
  - 24 early career.tw,kf. (3464)
  - 25 scientist\*.tw. (78486)
  - 26 researcher\*.tw,kf. (265340)
  - 27 research team\*.tw,kf. (13665)
  - 28 research cluster\*.tw,kf. (123)
  - 29 physician\*.tw,kf. (631076)
  - 30 (post doctoral or postdoctoral).tw,kf. (2793)
  - 31 (PhD or DPhil or MDPHD or DSci).tw,kf. (17315)
  - 32 investigator\*.tw,kf. (143006)
  - 33 or/21-32 (1130463)
  - 34 6 and 20 and 33 (7931)

\*\*\*\*\*

Database: EBM Reviews - Cochrane Central Register of Controlled Trials <October 2022>

Search Strategy:

- 
- 1 Biomedical Research/ (190)
  - 2 biomedical research.tw,kf. (533)
  - 3 biolog\* science\*.tw,kf. (24)
  - 4 (medic\* adj1 (research or academic\* or school\* or faculty)).tw,kf. (8615)
  - 5 Schools, Medical/ (79)
  - 6 Faculty, Medical/ (107)
  - 7 or/1-6 (9417)
  - 8 Research Support as Topic/ (36)
  - 9 (research adj2 (support\* or feedback)).tw,kf. (1630)
  - 10 peer review, research/ (38)
  - 11 peer review.tw,kf. (402)
  - 12 Financing, Government/ (46)
  - 13 Financing, Organized/ (19)
  - 14 ((organi?ed or government\*) adj2 financ\*).tw,kf. (12)
  - 15 "fellowships and scholarships"/ (32)
  - 16 fellowship\*.tw,kf. (576)
  - 17 scholarship\*.tw,kf. (95)
  - 18 "Awards and Prizes"/ (81)
  - 19 award\*.tw,kf. (1222)
  - 20 prize\*.tw,kf. (388)
  - 21 (((application\* or proposal\*) adj5 (resubmi\* or re-submi\* or resourc\* or nomination\* or stud\* or support\* or discussion or review or feedback or database or probabilit\* or likelihood or parity or dispar\* or submit\* or submiss\* or success\*)) and (grant\* or fund\*)).tw,kf. (310)
  - 22 ((fund\* or grant\*) adj5 (applica\* or reappl\* or gap or gaps or rate or rates or probabilit\* or likelihood or parity or dispar\* or submit\* or resubmi\* or re-submi\* or submiss\* or success\* or resourc\* or stud\* or proposal\* or support\* or discussion\* or review\* or feedback\* or database)).tw,kf. (7054)
  - 23 or/8-22 (10950)
  - 24 Research Personnel/ (115)
  - 25 research personnel.tw,kf. (355)
  - 26 applicant\*.tw,kf. (440)
  - 27 early career.tw,kf. (45)
  - 28 scientist\*.tw. (1037)
  - 29 researcher\*.tw,kf. (19710)
  - 30 research team\*.tw,kf. (4677)
  - 31 research cluster\*.tw,kf. (5)
  - 32 physician\*.tw,kf. (46162)
  - 33 (post doctoral or postdoctoral).tw,kf. (71)
  - 34 (PhD or DPhil or MDPhD or DSci).tw,kf. (1214)
  - 35 investigator\*.tw,kf. (71452)
  - 36 or/24-35 (133921)
  - 37 7 and 23 and 36 (151)

\*\*\*\*\*

Database: Ovid MEDLINE(R) and Epub Ahead of Print, In-Process, In-Data-Review & Other Non-Indexed Citations, Daily and Versions <1946 to November 09, 2022>

Search Strategy:

- 
- 1 Biomedical Research/ (78277)
  - 2 biomedical research\*.tw,kf. (17612)
  - 3 biolog\* science\*.tw,kf. (4737)
  - 4 (medic\* adj1 (research\* or academic\* or school\* or faculty)).tw,kf. (93916)
  - 5 Schools, Medical/ (27608)
  - 6 Faculty, Medical/ (14563)
  - 7 or/1-6 (208619)
  - 8 Research Support as Topic/ (22926)
  - 9 (research adj2 (support\* or feedback)).tw,kf. (16347)
  - 10 peer review, research/ (7311)
  - 11 peer review.tw,kf. (11125)
  - 12 Financing, Government/ (21332)
  - 13 Financing, Organized/ (7044)
  - 14 ((organized or government\*) adj2 financ\*).tw,kf. (1437)
  - 15 "fellowships and scholarships"/ (9104)
  - 16 fellowship\*.tw,kf. (14237)
  - 17 scholarship\*.tw,kf. (8027)
  - 18 "Awards and Prizes"/ (18279)
  - 19 award\*.tw,kf. (25630)
  - 20 prize\*.tw,kf. (9045)
  - 21 (((application\* or proposal\*) adj5 (resubmi\* or re-submi\* or resourc\* or nomination\* or stud\* or support\* or discussion or review or feedback or database or probabilit\* or likelihood or parity or dispar\* or submit\* or submiss\* or success\*)) and (grant\* or fund\*)).tw,kf. (5424)
  - 22 ((fund\* or grant\*) adj5 (applica\* or reappl\* or gap or gaps or rate or rates or probabilit\* or likelihood or parity or dispar\* or submit\* or resubmi\* or re-submi\* or submiss\* or success\* or resourc\* or stud\* or proposal\* or support\* or discussion\* or review\* or feedback\* or database)).tw,kf. (58547)
  - 23 or/8-22 (195780)
  - 24 Research Personnel/ (19459)
  - 25 research personnel.tw,kf. (509)
  - 26 applicant\*.tw,kf. (10270)
  - 27 early career.tw,kf. (2818)
  - 28 scientist\*.tw. (66604)
  - 29 researcher\*.tw,kf. (226164)
  - 30 research team\*.tw,kf. (9838)
  - 31 research cluster\*.tw,kf. (119)
  - 32 physician\*.tw,kf. (445050)
  - 33 (post doctoral or postdoctoral).tw,kf. (2189)
  - 34 (PhD or DPhil or MDPhD or DSci).tw,kf. (11788)
  - 35 investigator\*.tw,kf. (95830)
  - 36 or/24-35 (844601)
  - 37 7 and 23 and 36 (5378)

\*\*\*\*\*

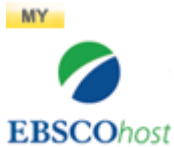

Wednesday, November 23, 2022 1:24:26 AM

| #  | Query                                                                                                                                          | Limiters/Expanders               | Last Run Via                                                                                                    | Results |
|----|------------------------------------------------------------------------------------------------------------------------------------------------|----------------------------------|-----------------------------------------------------------------------------------------------------------------|---------|
| S1 | DE "Experimentation"                                                                                                                           | Search modes -<br>Boolean/Phrase | Interface - EBSCOhost<br>Research Databases<br>Search Screen - Advanced<br>Search<br>Database - CINAHL Complete | 127     |
| S2 | TI biomedical research*<br>OR AB biomedical<br>research*                                                                                       | Search modes -<br>Boolean/Phrase | Interface - EBSCOhost<br>Research Databases<br>Search Screen - Advanced<br>Search<br>Database - CINAHL Complete | Display |
| S3 | TI biolog* science* OR AB<br>biolog* science*                                                                                                  | Search modes -<br>Boolean/Phrase | Interface - EBSCOhost<br>Research Databases<br>Search Screen - Advanced<br>Search<br>Database - CINAHL Complete | Display |
| S4 | TI (medic* N1 (research*<br>or academic* or school* or<br>faculty)) OR AB ((medic*<br>N1 (research* or<br>academic* or school* or<br>faculty)) | Search modes -<br>Boolean/Phrase | Interface - EBSCOhost<br>Research Databases<br>Search Screen - Advanced<br>Search<br>Database - CINAHL Complete | Display |
| S5 | DE "Medical Residency"                                                                                                                         | Search modes -<br>Boolean/Phrase | Interface - EBSCOhost<br>Research Databases<br>Search Screen - Advanced<br>Search<br>Database - CINAHL Complete | 13,679  |
| S6 | DE "Research Quality"                                                                                                                          | Search modes -<br>Boolean/Phrase | Interface - EBSCOhost<br>Research Databases<br>Search Screen - Advanced<br>Search<br>Database - CINAHL Complete | 191,620 |
| S7 | TI ( research N2 (support*<br>or feedback) ) OR AB (                                                                                           | Search modes -<br>Boolean/Phrase | Interface - EBSCOhost<br>Research Databases<br>Search Screen - Advanced                                         | Display |

|     |                                                                                              |                               |                                                                                                              |         |
|-----|----------------------------------------------------------------------------------------------|-------------------------------|--------------------------------------------------------------------------------------------------------------|---------|
|     | research N2 (support* or feedback) )                                                         |                               | Search<br>Database - CINAHL Complete                                                                         |         |
| S8  | TI peer review* OR AB peer review*                                                           | Search modes - Boolean/Phrase | Interface - EBSCOhost<br>Research Databases<br>Search Screen - Advanced Search<br>Database - CINAHL Complete | Display |
| S9  | DE "Government Programs"                                                                     | Search modes - Boolean/Phrase | Interface - EBSCOhost<br>Research Databases<br>Search Screen - Advanced Search<br>Database - CINAHL Complete | 6,911   |
| S10 | TI ( (organi?ed or government*) N2 financ* ) OR AB ( (organi?ed or government*) N2 financ* ) | Search modes - Boolean/Phrase | Interface - EBSCOhost<br>Research Databases<br>Search Screen - Advanced Search<br>Database - CINAHL Complete | Display |
| S11 | DE "Awards (Merit)"                                                                          | Search modes - Boolean/Phrase | Interface - EBSCOhost<br>Research Databases<br>Search Screen - Advanced Search<br>Database - CINAHL Complete | 320     |
| S12 | TI fellowship* OR AB fellowship*                                                             | Search modes - Boolean/Phrase | Interface - EBSCOhost<br>Research Databases<br>Search Screen - Advanced Search<br>Database - CINAHL Complete | Display |
| S13 | TI scholarship* OR AB scholarship*                                                           | Search modes - Boolean/Phrase | Interface - EBSCOhost<br>Research Databases<br>Search Screen - Advanced Search<br>Database - CINAHL Complete | Display |
| S14 | TI prize* OR AB prize*                                                                       | Search modes - Boolean/Phrase | Interface - EBSCOhost<br>Research Databases<br>Search Screen - Advanced Search<br>Database - CINAHL Complete | Display |
| S15 | TI award* OR AB award*                                                                       | Search modes - Boolean/Phrase | Interface - EBSCOhost<br>Research Databases<br>Search Screen - Advanced                                      | Display |

|     |                                                                                                                                                                                                                                                                                                                                                                                                                                                                                                                                                        |                               | Search<br>Database - CINAHL Complete                                                                            |         |
|-----|--------------------------------------------------------------------------------------------------------------------------------------------------------------------------------------------------------------------------------------------------------------------------------------------------------------------------------------------------------------------------------------------------------------------------------------------------------------------------------------------------------------------------------------------------------|-------------------------------|-----------------------------------------------------------------------------------------------------------------|---------|
| S16 | TI ( (application* or proposal*) N5 (resubmi* or re-submi* or resourc* or nomination* or stud* or support* or discussion or review or feedback or database or probabilit* or likelihood or parity or dispar* or submit* or submiss* or success*)) and (grant* or fund*) ) OR AB ( (application* or proposal*) N5 (resubmi* or re-submi* or resourc* or nomination* or stud* or support* or discussion or review or feedback or database or probabilit* or likelihood or parity or dispar* or submit* or submiss* or success*)) and (grant* or fund*) ) | Search modes - Boolean/Phrase | Interface - EBSCOhost<br>Research Databases<br>Search Screen - Advanced<br>Search<br>Database - CINAHL Complete | Display |
| S17 | TI ( (fund* or grant*) N5 (applica* or reappl* or gap or gaps or rate or rates or probabilit* or likelihood or parity or dispar* or submit* or resubmi* or re-submi* or submiss* or success* or resourc* or stud* or proposal* or support* or discussion* or review* or feedback* or database) ) OR AB ( (fund* or grant*) N5 (applica* or reappl* or gap or gaps or rate or rates or probabilit* or likelihood or parity or dispar* or submit* or resubmi* or re-submi* or submiss* or success* or                                                    | Search modes - Boolean/Phrase | Interface - EBSCOhost<br>Research Databases<br>Search Screen - Advanced<br>Search<br>Database - CINAHL Complete | Display |

|     |                                                                                                           |                                  |                                                                                                                 |         |
|-----|-----------------------------------------------------------------------------------------------------------|----------------------------------|-----------------------------------------------------------------------------------------------------------------|---------|
|     | resourc* or stud* or<br>proposal* or support* or<br>discussion* or review* or<br>feedback* or database) ) |                                  |                                                                                                                 |         |
| S18 | DE "Stakeholder"                                                                                          | Search modes -<br>Boolean/Phrase | Interface - EBSCOhost<br>Research Databases<br>Search Screen - Advanced<br>Search<br>Database - CINAHL Complete | 491     |
| S19 | TI research personnel OR<br>AB research personnel                                                         | Search modes -<br>Boolean/Phrase | Interface - EBSCOhost<br>Research Databases<br>Search Screen - Advanced<br>Search<br>Database - CINAHL Complete | Display |
| S20 | TI applicant* OR AB<br>applicant*                                                                         | Search modes -<br>Boolean/Phrase | Interface - EBSCOhost<br>Research Databases<br>Search Screen - Advanced<br>Search<br>Database - CINAHL Complete | Display |
| S21 | TI early career OR AB<br>early career                                                                     | Search modes -<br>Boolean/Phrase | Interface - EBSCOhost<br>Research Databases<br>Search Screen - Advanced<br>Search<br>Database - CINAHL Complete | Display |
| S22 | TI scientist* OR AB<br>scientist*                                                                         | Search modes -<br>Boolean/Phrase | Interface - EBSCOhost<br>Research Databases<br>Search Screen - Advanced<br>Search<br>Database - CINAHL Complete | Display |
| S23 | TI research team* OR AB<br>research team*                                                                 | Search modes -<br>Boolean/Phrase | Interface - EBSCOhost<br>Research Databases<br>Search Screen - Advanced<br>Search<br>Database - CINAHL Complete | Display |
| S24 | TI research cluster* OR<br>AB research cluster*                                                           | Search modes -<br>Boolean/Phrase | Interface - EBSCOhost<br>Research Databases<br>Search Screen - Advanced<br>Search<br>Database - CINAHL Complete | Display |
| S25 | TI researcher* OR AB                                                                                      | Search modes -                   | Interface - EBSCOhost                                                                                           | Display |



|     |                                                                                           |                                  |                                                                                                                 |         |
|-----|-------------------------------------------------------------------------------------------|----------------------------------|-----------------------------------------------------------------------------------------------------------------|---------|
|     | researcher*                                                                               | Boolean/Phrase                   | Research Databases<br>Search Screen - Advanced<br>Search<br>Database - CINAHL Complete                          |         |
| S26 | TI physician* OR AB<br>physician*                                                         | Search modes -<br>Boolean/Phrase | Interface - EBSCOhost<br>Research Databases<br>Search Screen - Advanced<br>Search<br>Database - CINAHL Complete | Display |
| S27 | TI ( post doctoral or<br>postdoctoral ) OR AB (<br>post doctoral or<br>postdoctoral )     | Search modes -<br>Boolean/Phrase | Interface - EBSCOhost<br>Research Databases<br>Search Screen - Advanced<br>Search<br>Database - CINAHL Complete | Display |
| S28 | TI ( PhD or DPhil or<br>MDPhD or DSci ) OR AB (<br>PhD or DPhil or MDPHD<br>or DSci )     | Search modes -<br>Boolean/Phrase | Interface - EBSCOhost<br>Research Databases<br>Search Screen - Advanced<br>Search<br>Database - CINAHL Complete | Display |
| S29 | TI investigator* OR AB<br>investigator*                                                   | Search modes -<br>Boolean/Phrase | Interface - EBSCOhost<br>Research Databases<br>Search Screen - Advanced<br>Search<br>Database - CINAHL Complete | Display |
| S30 | S1 OR S2 OR S3 OR S4<br>OR S5                                                             | Search modes -<br>Boolean/Phrase | Interface - EBSCOhost<br>Research Databases<br>Search Screen - Advanced<br>Search<br>Database - APA PsycInfo    | 91,229  |
| S31 | S6 OR S7 OR S8 OR S9<br>OR S10 OR S11 OR S12<br>OR S13 OR S14 OR S15<br>OR S16 OR S17     | Search modes -<br>Boolean/Phrase | Interface - EBSCOhost<br>Research Databases<br>Search Screen - Advanced<br>Search<br>Database - APA PsycInfo    | 95,233  |
| S32 | S18 OR S19 OR S20 OR<br>S21 OR S22 OR S23 OR<br>S24 OR S25 OR S26 OR<br>S27 OR S28 OR S29 | Search modes -<br>Boolean/Phrase | Interface - EBSCOhost<br>Research Databases<br>Search Screen - Advanced<br>Search<br>Database - APA PsycInfo    | 331,477 |
| S33 | S30 AND S31 AND S32                                                                       | Search modes -                   | Interface - EBSCOhost                                                                                           | 2,260   |

Boolean/Phrase

Research Databases

Search Screen - Advanced

Search

Database - APA PsycInfo

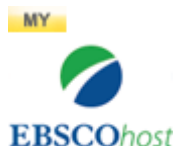

Wednesday, November 23, 2022 12:29:06 AM

| #  | Query                                                                                                                                          | Limiters/Expanders               | Last Run Via                                                                                                    | Results |
|----|------------------------------------------------------------------------------------------------------------------------------------------------|----------------------------------|-----------------------------------------------------------------------------------------------------------------|---------|
| S1 | (MH "Research, Medical+")                                                                                                                      | Search modes -<br>Boolean/Phrase | Interface - EBSCOhost<br>Research Databases<br>Search Screen - Advanced<br>Search<br>Database - CINAHL Complete | 36,942  |
| S2 | TI biomedical research*<br>OR AB biomedical<br>research*                                                                                       | Search modes -<br>Boolean/Phrase | Interface - EBSCOhost<br>Research Databases<br>Search Screen - Advanced<br>Search<br>Database - CINAHL Complete | 3,596   |
| S3 | TI biolog* science* OR AB<br>biolog* science*                                                                                                  | Search modes -<br>Boolean/Phrase | Interface - EBSCOhost<br>Research Databases<br>Search Screen - Advanced<br>Search<br>Database - CINAHL Complete | Display |
| S4 | TI (medic* N1 (research*<br>or academic* or school* or<br>faculty)) OR AB ((medic*<br>N1 (research* or<br>academic* or school* or<br>faculty)) | Search modes -<br>Boolean/Phrase | Interface - EBSCOhost<br>Research Databases<br>Search Screen - Advanced<br>Search<br>Database - CINAHL Complete | 41,598  |
| S5 | (MH "Schools, Medical")                                                                                                                        | Search modes -<br>Boolean/Phrase | Interface - EBSCOhost<br>Research Databases<br>Search Screen - Advanced<br>Search<br>Database - CINAHL Complete | Display |
| S6 | (MH "Faculty, Medical")                                                                                                                        | Search modes -<br>Boolean/Phrase | Interface - EBSCOhost<br>Research Databases<br>Search Screen - Advanced<br>Search<br>Database - CINAHL Complete | Display |
| S7 | S1 OR S2 OR S3 OR S4<br>OR S5 OR S6                                                                                                            | Search modes -<br>Boolean/Phrase | Interface - EBSCOhost<br>Research Databases<br>Search Screen - Advanced                                         | 86,196  |

|     |                                                                                              |                               |                                                                                                              |         |
|-----|----------------------------------------------------------------------------------------------|-------------------------------|--------------------------------------------------------------------------------------------------------------|---------|
|     |                                                                                              |                               | Search<br>Database - CINAHL Complete                                                                         |         |
| S8  | (MH "Research Support+")                                                                     | Search modes - Boolean/Phrase | Interface - EBSCOhost<br>Research Databases<br>Search Screen - Advanced Search<br>Database - CINAHL Complete | Display |
| S9  | TI ( research N2 (support* or feedback) ) OR AB ( research N2 (support* or feedback) )       | Search modes - Boolean/Phrase | Interface - EBSCOhost<br>Research Databases<br>Search Screen - Advanced Search<br>Database - CINAHL Complete | Display |
| S10 | (MH "Peer Review")                                                                           | Search modes - Boolean/Phrase | Interface - EBSCOhost<br>Research Databases<br>Search Screen - Advanced Search<br>Database - CINAHL Complete | Display |
| S11 | TI peer review* OR AB peer review*                                                           | Search modes - Boolean/Phrase | Interface - EBSCOhost<br>Research Databases<br>Search Screen - Advanced Search<br>Database - CINAHL Complete | 20,645  |
| S12 | (MH "Financing, Government")                                                                 | Search modes - Boolean/Phrase | Interface - EBSCOhost<br>Research Databases<br>Search Screen - Advanced Search<br>Database - CINAHL Complete | Display |
| S13 | (MH "Financing, Organized")                                                                  | Search modes - Boolean/Phrase | Interface - EBSCOhost<br>Research Databases<br>Search Screen - Advanced Search<br>Database - CINAHL Complete | Display |
| S14 | TI ( (organi?ed or government*) N2 financ* ) OR AB ( (organi?ed or government*) N2 financ* ) | Search modes - Boolean/Phrase | Interface - EBSCOhost<br>Research Databases<br>Search Screen - Advanced Search<br>Database - CINAHL Complete | Display |
| S15 | (MH "Medical Fellowships") OR (MH "Training Support,                                         | Search modes - Boolean/Phrase | Interface - EBSCOhost<br>Research Databases<br>Search Screen - Advanced                                      | Display |

|     |                                                                                                                                                                                                                                                                                                                                                        |                               |                                                                                                              |         |
|-----|--------------------------------------------------------------------------------------------------------------------------------------------------------------------------------------------------------------------------------------------------------------------------------------------------------------------------------------------------------|-------------------------------|--------------------------------------------------------------------------------------------------------------|---------|
|     | Financial") OR (MH "Scholarship")                                                                                                                                                                                                                                                                                                                      |                               | Search Database - CINAHL Complete                                                                            |         |
| S16 | TI fellowship* OR AB fellowship*                                                                                                                                                                                                                                                                                                                       | Search modes - Boolean/Phrase | Interface - EBSCOhost<br>Research Databases<br>Search Screen - Advanced Search<br>Database - CINAHL Complete | Display |
| S17 | TI scholarship* OR AB scholarship*                                                                                                                                                                                                                                                                                                                     | Search modes - Boolean/Phrase | Interface - EBSCOhost<br>Research Databases<br>Search Screen - Advanced Search<br>Database - CINAHL Complete | Display |
| S18 | (MH "Awards and Honors")                                                                                                                                                                                                                                                                                                                               | Search modes - Boolean/Phrase | Interface - EBSCOhost<br>Research Databases<br>Search Screen - Advanced Search<br>Database - CINAHL Complete | Display |
| S19 | TI prize* OR AB prize*                                                                                                                                                                                                                                                                                                                                 | Search modes - Boolean/Phrase | Interface - EBSCOhost<br>Research Databases<br>Search Screen - Advanced Search<br>Database - CINAHL Complete | Display |
| S20 | TI award* OR AB award*                                                                                                                                                                                                                                                                                                                                 | Search modes - Boolean/Phrase | Interface - EBSCOhost<br>Research Databases<br>Search Screen - Advanced Search<br>Database - CINAHL Complete | Display |
| S21 | TI ( (application* or proposal*) N5 (resubmi* or re-submi* or resourc* or nomination* or stud* or support* or discussion or review or feedback or database or probabilit* or likelihood or parity or dispar* or submit* or submiss* or success*)) and (grant* or fund*) ) OR AB ( (application* or proposal*) N5 (resubmi* or re-submi* or resourc* or | Search modes - Boolean/Phrase | Interface - EBSCOhost<br>Research Databases<br>Search Screen - Advanced Search<br>Database - CINAHL Complete | Display |

|     |                                                                                                                                                                                                                                                                                                                                                                                                                                                                                                                                                                                                      |                               |                                                                                                                 |         |
|-----|------------------------------------------------------------------------------------------------------------------------------------------------------------------------------------------------------------------------------------------------------------------------------------------------------------------------------------------------------------------------------------------------------------------------------------------------------------------------------------------------------------------------------------------------------------------------------------------------------|-------------------------------|-----------------------------------------------------------------------------------------------------------------|---------|
|     | nomination* or stud* or support* or discussion or review or feedback or database or probabilit* or likelihood or parity or dispar* or submit* or submiss* or success*)) and (grant* or fund* )                                                                                                                                                                                                                                                                                                                                                                                                       |                               |                                                                                                                 |         |
| S22 | TI ( (fund* or grant*) N5 (applica* or reappl* or gap or gaps or rate or rates or probabilit* or likelihood or parity or dispar* or submit* or resubmi* or re-submi* or submiss* or success* or resourc* or stud* or proposal* or support* or discussion* or review* or feedback* or database) ) OR AB ( (fund* or grant*) N5 (applica* or reappl* or gap or gaps or rate or rates or probabilit* or likelihood or parity or dispar* or submit* or resubmi* or re-submi* or submiss* or success* or resourc* or stud* or proposal* or support* or discussion* or review* or feedback* or database) ) | Search modes - Boolean/Phrase | Interface - EBSCOhost<br>Research Databases<br>Search Screen - Advanced<br>Search<br>Database - CINAHL Complete | Display |
| S23 | S8 OR S9 OR S10 OR S11 OR S12 OR S13 OR S14 OR S15 OR S16 OR S17 OR S18 OR S19 OR S20 OR S21 OR S22                                                                                                                                                                                                                                                                                                                                                                                                                                                                                                  | Search modes - Boolean/Phrase | Interface - EBSCOhost<br>Research Databases<br>Search Screen - Advanced<br>Search<br>Database - CINAHL Complete | 670,902 |
| S24 | (MH "Research Personnel")                                                                                                                                                                                                                                                                                                                                                                                                                                                                                                                                                                            | Search modes - Boolean/Phrase | Interface - EBSCOhost<br>Research Databases<br>Search Screen - Advanced<br>Search<br>Database - CINAHL Complete | Display |
| S25 | TI research personnel OR                                                                                                                                                                                                                                                                                                                                                                                                                                                                                                                                                                             | Search modes -                | Interface - EBSCOhost                                                                                           | Display |

|     |                                                 |                                  |                                                                                                                 |         |
|-----|-------------------------------------------------|----------------------------------|-----------------------------------------------------------------------------------------------------------------|---------|
|     | AB research personnel                           | Boolean/Phrase                   | Research Databases<br>Search Screen - Advanced<br>Search<br>Database - CINAHL Complete                          |         |
| S26 | TI applicant* OR AB<br>applicant*               | Search modes -<br>Boolean/Phrase | Interface - EBSCOhost<br>Research Databases<br>Search Screen - Advanced<br>Search<br>Database - CINAHL Complete | Display |
| S27 | TI early career OR AB<br>early career           | Search modes -<br>Boolean/Phrase | Interface - EBSCOhost<br>Research Databases<br>Search Screen - Advanced<br>Search<br>Database - CINAHL Complete | 2,147   |
| S28 | TI scientist* OR AB<br>scientist*               | Search modes -<br>Boolean/Phrase | Interface - EBSCOhost<br>Research Databases<br>Search Screen - Advanced<br>Search<br>Database - CINAHL Complete | 15,403  |
| S29 | TI research team* OR AB<br>research team*       | Search modes -<br>Boolean/Phrase | Interface - EBSCOhost<br>Research Databases<br>Search Screen - Advanced<br>Search<br>Database - CINAHL Complete | 7,708   |
| S30 | TI research cluster* OR<br>AB research cluster* | Search modes -<br>Boolean/Phrase | Interface - EBSCOhost<br>Research Databases<br>Search Screen - Advanced<br>Search<br>Database - CINAHL Complete | 684     |
| S31 | TI researcher* OR AB<br>researcher*             | Search modes -<br>Boolean/Phrase | Interface - EBSCOhost<br>Research Databases<br>Search Screen - Advanced<br>Search<br>Database - CINAHL Complete | 99,310  |
| S32 | TI physician* OR AB<br>physician*               | Search modes -<br>Boolean/Phrase | Interface - EBSCOhost<br>Research Databases<br>Search Screen - Advanced<br>Search<br>Database - CINAHL Complete | 169,126 |
| S33 | TI ( post doctoral or                           | Search modes -                   | Interface - EBSCOhost                                                                                           | 744     |

|     |                                                                                  |                                  |                                                                                                                 |         |
|-----|----------------------------------------------------------------------------------|----------------------------------|-----------------------------------------------------------------------------------------------------------------|---------|
|     | postdoctoral ) OR AB ( post doctoral or postdoctoral )                           | Boolean/Phrase                   | Research Databases<br>Search Screen - Advanced<br>Search<br>Database - CINAHL Complete                          |         |
| S34 | TI ( PhD or DPhil or MDPHD or DSci ) OR AB ( PhD or DPhil or MDPHD or DSci )     | Search modes -<br>Boolean/Phrase | Interface - EBSCOhost<br>Research Databases<br>Search Screen - Advanced<br>Search<br>Database - CINAHL Complete | 7,690   |
| S35 | TI investigator* OR AB investigator*                                             | Search modes -<br>Boolean/Phrase | Interface - EBSCOhost<br>Research Databases<br>Search Screen - Advanced<br>Search<br>Database - CINAHL Complete | 28,797  |
| S36 | S24 OR S25 OR S26 OR S27 OR S28 OR S29 OR S30 OR S31 OR S32 OR S33 OR S34 OR S35 | Search modes -<br>Boolean/Phrase | Interface - EBSCOhost<br>Research Databases<br>Search Screen - Advanced<br>Search<br>Database - CINAHL Complete | 327,005 |
| S37 | S7 AND S23 AND S36                                                               | Search modes -<br>Boolean/Phrase | Interface - EBSCOhost<br>Research Databases<br>Search Screen - Advanced<br>Search<br>Database - CINAHL Complete | 3,987   |



Database: Ovid MEDLINE(R) and Epub Ahead of Print, In-Process, In-Data-Review & Other Non-Indexed Citations, Daily and Versions <1946 to November 09, 2022>

Search Strategy:

- 
- 1 Biomedical Research/ (78277)
  - 2 biomedical research\*.tw,kf. (17612)
  - 3 biolog\* science\*.tw,kf. (4737)
  - 4 (medic\* adj1 (research\* or academic\* or school\* or faculty)).tw,kf. (93916)
  - 5 Schools, Medical/ (27608)
  - 6 Faculty, Medical/ (14563)
  - 7 or/1-6 (208619)
  - 8 Research Support as Topic/ (22926)
  - 9 (research adj2 (support\* or feedback)).tw,kf. (16347)
  - 10 peer review, research/ (7311)
  - 11 peer review.tw,kf. (11125)
  - 12 Financing, Government/ (21332)
  - 13 Financing, Organized/ (7044)
  - 14 ((organized or government\*) adj2 financ\*).tw,kf. (1437)
  - 15 "fellowships and scholarships"/ (9104)
  - 16 fellowship\*.tw,kf. (14237)
  - 17 scholarship\*.tw,kf. (8027)
  - 18 "Awards and Prizes"/ (18279)
  - 19 award\*.tw,kf. (25630)
  - 20 prize\*.tw,kf. (9045)
  - 21 (((application\* or proposal\*) adj5 (resubmi\* or re-submi\* or resourc\* or nomination\* or stud\* or support\* or discussion or review or feedback or database or probabilit\* or likelihood or parity or dispar\* or submit\* or submiss\* or success\*)) and (grant\* or fund\*)).tw,kf. (5424)
  - 22 ((fund\* or grant\*) adj5 (applica\* or reappl\* or gap or gaps or rate or rates or probabilit\* or likelihood or parity or dispar\* or submit\* or resubmi\* or re-submi\* or submiss\* or success\* or resourc\* or stud\* or proposal\* or support\* or discussion\* or review\* or feedback\* or database)).tw,kf. (58547)
  - 23 or/8-22 (195780)
  - 24 Research Personnel/ (19459)
  - 25 research personnel.tw,kf. (509)
  - 26 applicant\*.tw,kf. (10270)
  - 27 early career.tw,kf. (2818)
  - 28 scientist\*.tw. (66604)
  - 29 researcher\*.tw,kf. (226164)
  - 30 research team\*.tw,kf. (9838)
  - 31 research cluster\*.tw,kf. (119)
  - 32 physician\*.tw,kf. (445050)
  - 33 (post doctoral or postdoctoral).tw,kf. (2189)
  - 34 (PhD or DPhil or MDPHD or DSci).tw,kf. (11788)
  - 35 investigator\*.tw,kf. (95830)
  - 36 or/24-35 (844601)
  - 37 7 and 23 and 36 (5378)

\*\*\*\*\*
